# Supplementary material
Source: publisher site journal article supplement (https://www.dovepress.com/article/427687)
Supplement: Supplementary file 1 [file get_supplementary_file.php]

**Sleep duration and kidney function – Does weekend sleep matter?**

Chia-Chao Wu 1,2 , Pei-Lin Yang 3, Li-Ting Kao 4,5,6, Yi-Chun Liu 7,8, Cai-Mei Zheng 9, Pauling Chu 1, Kuo‐Cheng Lu 10, Chi-Ming Chu, 7,11,12,13,Yu-Tien Chang 7*

| **Authors’ affiliations:**  1 Division of Nephrology, Department of Internal Medicine, Tri-Service General Hospital, National Defense Medical Center, Taipei, Taiwan  2 Department and Graduate Institute of Microbiology and Immunology, National Defense Medical Center, Taipei, Taiwan  3School of Nursing, National Defense Medical Center, Taipei City, Taiwan  4School of Pharmacy, National Defense Medical Center, Taipei, Taiwan  5Graduate Institute of Life Sciences, National Defense Medical Center, Taipei, Taiwan  6 Department of Pharmacy Practice, Tri-Service General Hospital, Taipei, Taiwan  7 School of Public Health, National Defense Medical Center, Taipei City, Taiwan  8 Institute of Medical Sciences, National Defense Medical Center, Taipei City, Taiwan  9Division of Nephrology, Department of Internal Medicine, Shuang Ho Hospital, Taipei Medical University, Taipei, Taiwan  10Division of Nephrology, Fu-Jen Catholic Hospital, Fu-Jen Catholic University  11 Department of Surgery, Songshan Branch of Tri-Service General Hospital, National Defense Medical Center, Taipei City, Taiwan  12 Division of Biostatistics and Informatics, Department of Epidemiology, School of Public Health, National Defense Medical Center, Taipei, Taiwan  13Department of Public Health, China Medical University, Taichung City, Taiwan | ***Corresponding author:**  Ph.D. Yu-Tien Chang  Tel.: +886-2-87923100#18454  Address:  School of Public Health, National Defense Medical Center  No.161, Sec. 6, Minquan E. Rd., Neihu Dist., Taipei City 11490, Taiwan (R.O.C.)  Email: [greengarden720925@gmail.com](mailto:greengarden720925@gmail.com) |
| --- | --- |

# Institution where work was performed

National Defense Medical Center

# A statement that all authors have seen and approved the manuscript

All authors made a significant contribution to the work reported, whether that is in the conception, study design, execution, acquisition of data, analysis and interpretation, or in all these areas; took part in drafting, revising or critically reviewing the article; gave final approval of the version to be published; have agreed on the journal to which the article has been submitted; and agree to be accountable for all aspects of the work.

# Declarations for each author:

All the authors have no known conflict to disclosure. This study was funded by Ministry of Science and Technology in Taiwan (110M142-143). This is not a clinical trial study.

# Number of tables: 2

# Number of figures:5

# Abstract word count:235

# Manuscript word count: 2,457


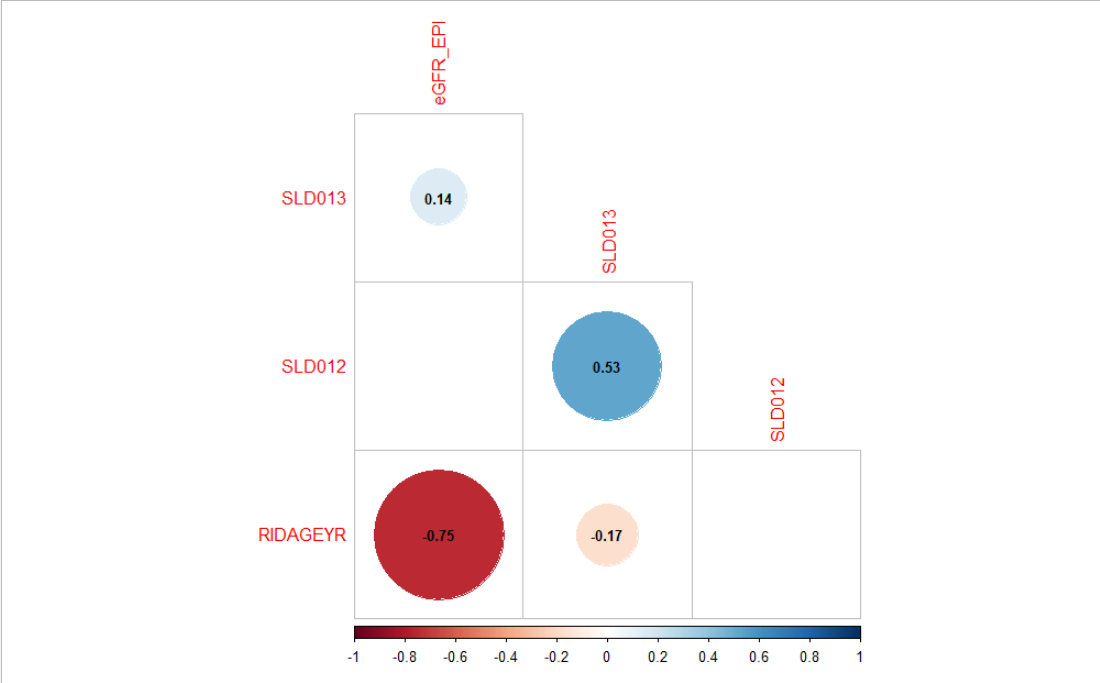


eGFR

Sleep duration on weekends

Sleep duration on weekends

Sleep duration on weekdays

Sleep duration on weekdays

Age

Pearson correlation r

### Figure S1 Pearson correlation matrix of sleep duration on weekdays/weekends, age, and eGFR levels. Not significant coefficients (p ≧ 0.05) were left blank.


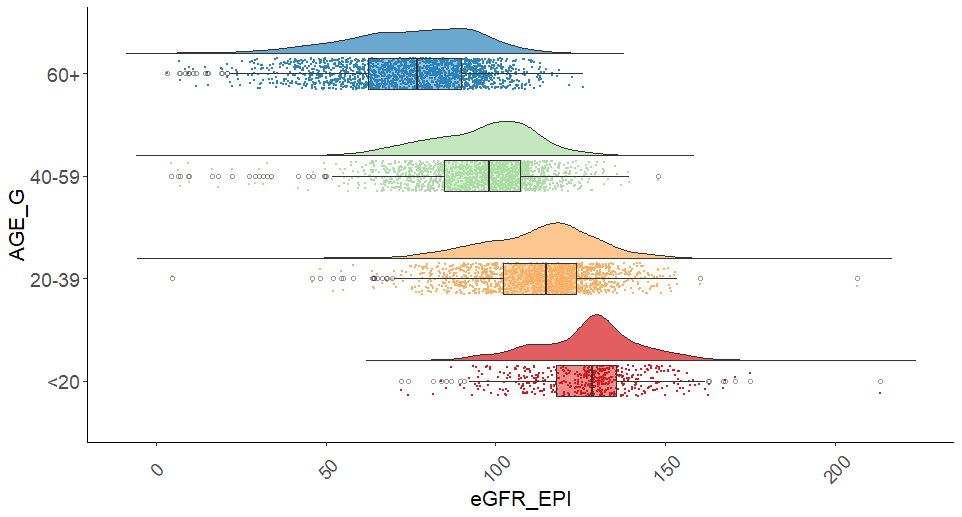


Age (year)

eGFR (ml/min/1.73 m2)

|  | eGFR (ml/min/1.73 m2) | |
| --- | --- | --- |
| Age (year) | Mean | Standard deviation |
| 60+ | 74.7 | 19.8 |
| 40-59 | 95.3 | 17.4 |
| 20-39 | 112.9 | 17.0 |
| <20 | 136.2 | 18.9 |

The p value of ANOVA test of age groups on eGFR levels was less than 2e-16.

### Figure S2 The raincloud plot of eGFR levels grouped by age.
